# Supplementary material
Source: Springer Nature journal article supplement (https://www.springermedizin.de/resource/supplementary/12950_2012_281_MOESM3_ESM.pdf/9557476)

A

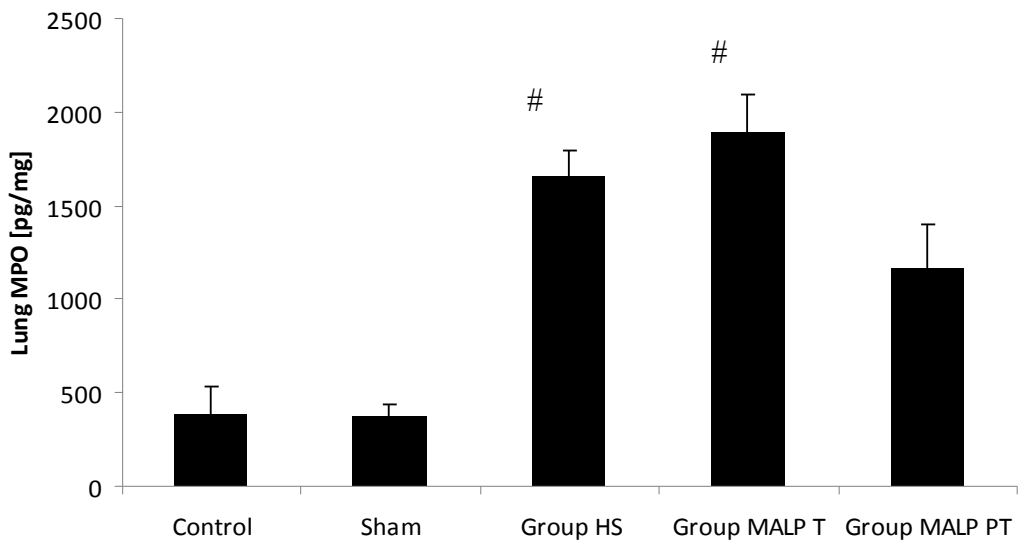

B

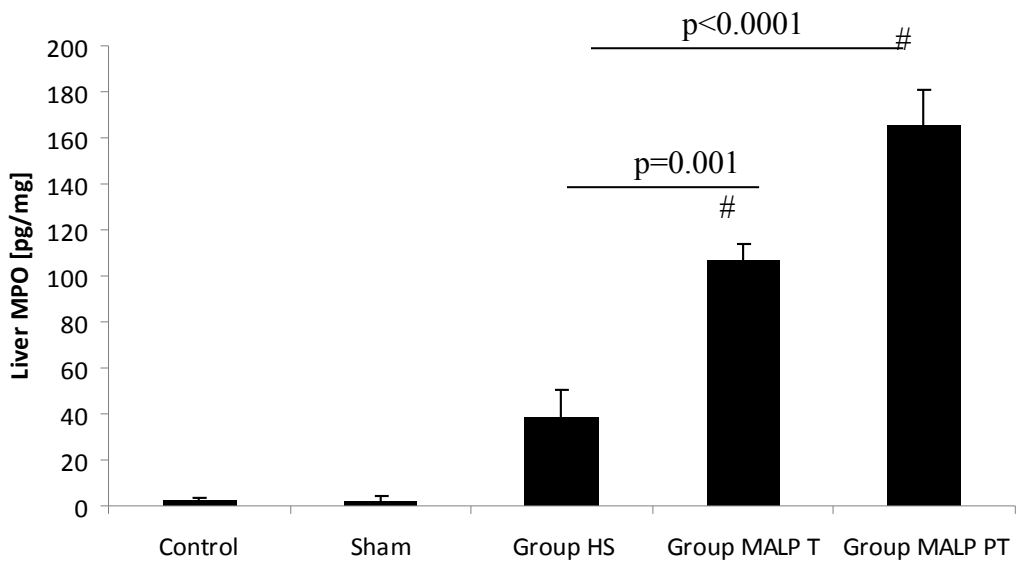

Supplement: MOESM3 [file 9557476]
